# Supplementary material for: Making two organelles from one: Woronin body biogenesis by peroxisomal protein sorting
Source: PubMed Central journal article supplement — J Cell Biol. 2008 Jan 28;180(2):325–39. doi: 10.1083/jcb.200705049 (PMC2213590; doi:10.1083/jcb.200705049), 2008-01-28
Supplement: jcellbiol_jcb.200705049_6.pdf [file jcellbiol_jcb.200705049_6.pdf]

Table S1. **Neurospora crassa strains used in this study**

| Strain     | Genotype (transformed plasmids are in parentheses)                                                                            | Use                                      |
|------------|-------------------------------------------------------------------------------------------------------------------------------|------------------------------------------|
| FGSC #3661 | <i>A, alcoy, csp-2</i>                                                                                                        | Mapping the original <i>wsc</i> mutant   |
| FGSC #6808 | <i>A, trp-1; ylo-1</i>                                                                                                        | Mapping the original <i>wsc</i> mutant   |
| FGSC #1208 | <i>a, trp-1; ylo-1</i>                                                                                                        | Mapping the original <i>wsc</i> mutant   |
| FGSC #52   | <i>A, ro-2</i>                                                                                                                | Mapping the original <i>wsc</i> mutant   |
| FGSC #4516 | <i>A, pro-1</i>                                                                                                               | Mapping the original <i>wsc</i> mutant   |
| FGSC #3305 | <i>A, ser-1</i>                                                                                                               | Mapping the original <i>wsc</i> mutant   |
| FGSC #5075 | <i>A, sc</i>                                                                                                                  | Mapping the original <i>wsc</i> mutant   |
| FGSC #9179 | <i>a, Δmus-52::bar +</i>                                                                                                      | Construction of deletions                |
| FGSC #9720 | <i>a, Δmus-52::bar +</i>                                                                                                      | Construction of deletions                |
| FGSC #6103 | <i>A, his-3-</i>                                                                                                              | Introduction of <i>his-3Δ200</i>         |
| FGSC #465  | <i>A, pan-2-</i>                                                                                                              | Genetic screen                           |
| GSF #48    | <i>a, pan-2- (POKE103::phex-GFP-PTS1)</i>                                                                                     | Figs. 1 A and 5 D                        |
| GSF #111   | <i>A, wsc- (POKE103::phex-GFP-PTS1)</i>                                                                                       | Fig. 1 A                                 |
| FGSC #987  | <i>A</i>                                                                                                                      | Fig. 1 (B and C)                         |
| GSF #59    | <i>A, wsc-</i>                                                                                                                | Fig. 1 (B and C)                         |
| GSF #623   | <i>A, pan-2- (pMF280)</i>                                                                                                     | Fig. 1 C                                 |
| GSF #626   | <i>A, Δwsc, pan-2- (pMF280)</i>                                                                                               | Fig. 1 C                                 |
| GSF #629   | <i>A, Δwsc, pan-2-, his-3- (pBM60::wsc-eGFP, POKE103::phex-RFP-PTS1)</i>                                                      | Figs. 3 A, 5 A, and 8 B                  |
| GSF #411   | <i>A, wsc-, (GJP#961::wsc-eGFP, POKE103::phex-RFP-PTS1)</i>                                                                   | Fig. 3 B                                 |
| GSF#1193   | <i>A, Δmus-52::bar +, his-3- (pBM60::RFP-PTS1)</i>                                                                            | Figs. 3 C and S2                         |
| GSF#1182   | <i>A, Δmus-52::bar +, Δfis1::hyg +, his-3- (pBM60::RFP-PTS1)</i>                                                              | Figs. 3 C and S2                         |
| GSF#1166   | <i>A, Δmus-52::bar +, Δdnm1::hyg +, his-3- (pBM60::RFP-PTS1)</i>                                                              | Figs. 3 C and S2                         |
| GSF#1164   | <i>A, Δmus-52::bar +, Δvps1::hyg +, his-3- (pBM60::RFP-PTS1)</i>                                                              | Figs. 3 C and S2                         |
| GSF #404   | <i>A, wsc- (GJP#961::wsc-3xHA)</i>                                                                                            | Fig. 4 (A and B) and Fig. 5 C            |
| GSF #360   | <i>A, wsc- (GJP#961::wsc-eGFP)</i>                                                                                            | Fig. 4 B                                 |
| GSF #399   | <i>A, wsc-, Δhex-1 (GJP#961::wsc-eGFP, POKE103::phex-RFP-PTS1)</i>                                                            | Figs. 5 A, 6 C, and 8 D                  |
| GSF #448   | <i>a, Δhex-1, wsc-, pan-2- (GJP#961::wsc-3xHA, GJP#961::wsc-eGFP)</i>                                                         | Fig. 5 (B and C), Fig. 6 C, and Fig. 8 D |
| GSF #38    | <i>A, Δhex-1, pan-2- (POKE103::phex-GFP-PTS1)</i>                                                                             | Fig. 5 D                                 |
| GSF #743   | <i>a, wsc-, Δhex-1 (POKE103::phex-wsc-eGFP, POKE103::phex-RFP-PTS1)</i>                                                       | Fig. 6 (A, B, D, and E) and Fig. 8 E     |
| GSF #823   | <i>a, wsc-, pan-2- (OKE103::phex-RFP-PTS1, pMF272::pex14)</i>                                                                 | Fig. 6 E                                 |
| GSF #621   | <i>A, wsc-, (GSP#961::wsc-eYFP, GSP#961::wsc-eYFP)</i>                                                                        | Fig. 6 F                                 |
| GJF #1732  | <i>S. cerevisiae - MAT<math>\alpha</math>, his3D1, leu2D0, lys2D0, ura3D0 (p413GPD::rfp-pts1, p415GPD)</i>                    | Fig. 7 (A and B)                         |
| GJF #1758  | <i>S. cerevisiae - MAT<math>\alpha</math>, his3D1, leu2D0, lys2D0, ura3D0 (p413GPD::rfp-pts1, p416GPD::wsc-egfp, p415GPD)</i> | Fig. 7 (A–D)                             |
| GSF #452   | <i>A, Δwsc, pan-2-, his-3-</i>                                                                                                | Fig. 8 A                                 |
| GSF #475   | <i>A, Δwsc, pan-2-, his-3- (pBM60::wsc-eGFP)</i>                                                                              | Fig. 8 A                                 |
| GSF #506   | <i>A, Δwsc, pan-2-, his-3- (pBM60::wscR102Q-eGFP)</i>                                                                         | Fig. 8 A                                 |
| GSF #515   | <i>A, Δwsc, pan-2-, his-3- (pBM60::wscR102W-eGFP)</i>                                                                         | Fig. 8 A                                 |
| GSF #631   | <i>A, Δwsc, pan-2-, his-3- (pBM60::wscR102Q-eGFP, POKE103::phex-RFP-PTS1)</i>                                                 | Fig. 8 B                                 |
| GSF #634   | <i>A, Δwsc, pan-2-, his-3- (pBM60::wscR102W-eGFP, POKE103::phex-RFP-PTS1)</i>                                                 | Fig. 8 B                                 |
| GSF #562   | <i>A, Δwsc, pan-2, his-3- (pBM60::wsc-3xHA)</i>                                                                               | Fig. 8 C                                 |
| GSF #568   | <i>A, Δwsc, pan-2 his-3- (pBM60::wscR102W-3xHA)</i>                                                                           | Fig. 8 C                                 |
| GSF #857   | <i>a, Δhex-1, wsc-, pan-2- (GJP#961::wscR102W-3xHA, GJP#961::wscR102W-eGFP)</i>                                               | Fig. 8 D                                 |
| GSF #1004  | <i>a, wsc-, Δhex-1 (POKE103::phex-wscR102W-eGFP, POKE103::phex-RFP-PTS1)</i>                                                  | Fig. 8 E                                 |
| GSF #302   | <i>A, Δhex-1, pan-2-</i>                                                                                                      | Fig. S1                                  |
| GSF #299   | <i>a, Δhex-1, wsc-, pan-2-</i>                                                                                                | Fig. S1                                  |
| GSF #277   | <i>a, wsc-, pan-2-</i>                                                                                                        | Fig. S1                                  |
| GSF #290   | <i>a, pan-2-</i>                                                                                                              | Fig. S1                                  |
| GSF #459   | <i>A, pex 14-, wsc-, pan-2-</i>                                                                                               | Fig. S1                                  |
| GSF #462   | <i>A, pex 14-, pan-2-</i>                                                                                                     | Fig. S1                                  |
| GSF #543   | <i>A, Δwsc, pan-2-, his-3- (POKE103::phex-RFP-PTS1)</i>                                                                       | Fig. S2                                  |

Table S2. **Plasmids**

| <b>Plasmid</b>  | <b>Identity/source</b>        |
|-----------------|-------------------------------|
| pEGFP-N1        | Clontech Laboratories, Inc.   |
| pEYFP-N1        | Clontech Laboratories, Inc.   |
| pRSET-B mCherry | Shaner et al., 2004           |
| pREP-41         | Craven et al., 1998           |
| pBM-60          | Margolin et al., 1997         |
| pMF272          | Freitag et al., 2004          |
| pMF280          | Freitag et al., 2004          |
| pBS + SK        | Stratagene                    |
| pCSN43          | Staben et al., 1989           |
| p413GPD         | Sikorski and Hieter, 1989     |
| p415GPD         | Sikorski and Hieter, 1989     |
| p416GPD         | Sikorski and Hieter, 1989     |
| GJP #602        | Tey et al., 2005              |
| GJP #613        | Tey et al., 2005              |
| GJP #961        | pBS + SK::hygr                |
| GJP #1001       | TOPOII::wsc                   |
| GJP #1009       | TOPOII::wsc deletion cassette |
| GJP #1010       | GJP#961::wsc                  |
| GJP #1050       | GJP#961::wsc(new XbaI&SphI)   |
| GJP #1064       | GJP#961::wsc-3xha             |
| GJP #1081       | GJP#961::wsc-egfp             |
| GJP #1245       | pBM60::wsc-egfp               |
| GJP #1302       | GJP#961::wsc-eYFP1            |
| GJP #1304       | GJP#961::wsc-eYFP11           |
| GJP #1322       | pBM60::wscR102Q-egfp          |
| GJP #1324       | pBM60::wscR102W-egfp          |
| GJP #1353       | pBM60::wsc-3xha               |
| GJP #1361       | pBM60::wscR102W-3xha          |
| GJP #1372       | pBM60::wscR102Q-3xha          |
| GJP #1406       | POKE 103::phex-rfp-pts1       |
| GJP #1500       | POKE 103::phex-wsc-gfp        |
| GJP #1530       | pMF272::pex14                 |
| GJP #1561       | GJP#961::wscR102W-3xha        |
| GJP #1564       | GJP#961::wscR102W-egfp        |
| GJP #1662       | p416GPD::wsc-egfp             |
| GJP #1712       | p413GPD::rfp-pts1             |
| GJP #1821       | POKE 103::phex-wscR102W-gfp   |
| GJP #1876       | pBM60::rfp-pts1               |

Craven, R.A., D.J. Griffiths, K.S. Sheldrick, R.E. Randall, I.M. Hagan, and A.M. Carr. 1998. *Gene*. 221:59–68.

Freitag, M., P.C. Hickey, N.B. Raju, E.U. Selker, and N.D. Read. 2004. *Fungal Genet. Biol.* 41:897–910.

Margolin, B.S., M. Freitag, and E.U. Selker. 1997. *Fungal Genetics Newsletter*. 44:34–36.

Shaner, N.C., R.E. Campbell, P.A. Steinbach, B.N. Giepmans, A.E. Palmer, and R.Y. Tsien. 2004. *Nat. Biotechnol.* 22:1567–1572.

Sikorski, R.S. and P. Hieter. 1989. *Genetics*. 122:19–27.

Tey, W.K., A.J. North, J.L. Reyes, Y.F. Lu, and G. Jedd. 2005. *Mol. Biol. Cell*. 16:2651–2659.

Table S3. **Oligonucleotides**

| <b>Name of oligo</b> | <b>Sequence (5'-3')</b>                         |
|----------------------|-------------------------------------------------|
| BS + SK-Pacl.f       | cgataccgctgacctaattaagggcccggtacc               |
| BS + SK-Pacl.r       | gggtaccggcccttaattaaggctgacggatcg               |
| HYGr.NoI             | gccggcgccgcaagatgatattgaagga                    |
| HYGr.Pacl            | gccitaattaagttcggtcgcatctact                    |
| Pacl.kill.1          | tgggtaccggcccttagctaagttcggtcgga                |
| Pacl.Kill.2          | tccgaccgaacttagctaaggcccggtaccca                |
| Pacl create.1        | tccagctgcaattaataatcgccaacgcgcg                 |
| Pacl create.2        | cgcgctggccgattaataatgacgtggca                   |
| 7842.f-2             | gcgccggccgagaaatggagatcagagcagga                |
| 7842.r-2             | gcgttaattaatggaaggctgcatcgaggacca               |
| 7842.r-3             | gcgactagtggaggctgcatcgaggacca                   |
| 7842-Seq.f-1         | cacatagcagtcacgatcca                            |
| 7842-Seq.f-2         | gcaatgatggccatggcaaca                           |
| 7842-Seq.r-1         | gtaccgtaccggfaccgcta                            |
| 7842-Seq.r-2         | ctgacctatcgttaccctca                            |
| 7842.P-1             | acgcagagagccctcgcaagt                           |
| 7842.P-2             | ttcaatatcatctgcccgcgctcaagcctgcagaggaaggga      |
| 7842.P-3             | atgccgaccgaacttaataagatggacatcgagttcgagct       |
| 7842.P-4             | gltcggatgctggagggaaggt                          |
| 7842.P-5             | tgccttcctctgaggcttgacgcggccgcaagatgatattgaa     |
| 7842.P-6             | agctcgaactcgatgtccatcctaataagttcggtcgcat        |
| eGFP-3'-Xbal         | gctctagaatgtgagcaaggcgaggagct                   |
| eGFP-3'-SphI         | cgcgcatgcttactgtacagctcgctccatgc                |
| HA-3'-Xbal           | gcgtctagaatggcaccctfacgatgtt                    |
| HA-3'-SphI           | gcggcatgcttaagcgtaatctggcaacgtcgtaa             |
| 7842-3'-Mut-1        | ccagaacccccgtactctagaaaaatgctagctcgggccagctcaag |
| 7842-3'-Mut-2        | cttgagctggccgagctagcattttctagagtaacgggggttctgg  |
| 7842-3'-Mut-3        | ctctagaaaaatgcatgctcgggccagctc                  |
| 7842-3'-Mut-4        | gagctggcccgagcatgcatcttctagag                   |
| NotI .pts 1 .ch.5'   | gcagcgccgccatgggtgagcaaggcgca                   |
| PacI .pts 1 .ch.3'   | gccttaattaaggcgggactgtacagctcgtcca              |
| wsc5'-NotI           | gcggcgccgcccgtacctctctcgcc                      |
| wsc3'-Pacl           | gcgttaattaagcttactgtacagctcgtcca                |
| EYFP-I-3'-Xbal       | gcgtctagagatccaccggctgccaccat                   |
| EYFP-I-3'-SphI       | gcggcatgcttactgtcggcggatagatagagct              |
| EYFP-II-3'-Xbal      | gcgtctagatcaccgccgacaagcagaagaa                 |
| EYFP-II-3'-SphI      | gcggcatgcttactgtacagctcgtccat                   |
| Pex14-Spel           | gcactagtatggccatccgcgaggacct                    |
| Pex14-Pacl           | gccttaattaaggcggtctcgtcgcctcgt                  |
| wsc-gfp-5'-Spel      | gcgactagtatgctggtaaaagaacaccaca                 |
| wsc-gfp-3'-Xhol      | gcgctcaggttactgtacagctcgtccat                   |
| mCherry-5'-Spel      | gcgactagtatggtgagcaaggcgaggagga                 |
| mCherry-3'-Xhol      | gcgctcaggttagagctggactgtacagctcgtccatgccgcc     |
| wsc-Mut7-f           | gccatctggggacctggccgctgaagtag                   |
| wsc-Mut7-r           | ctacttcacggcccagggtcccaagatggc                  |
| wsc-Mut8-f           | gccatctggggaccaggcctgaagtag                     |
| wsc-Mut8-r           | ctacttcacggcctgggtcccaagatggc                   |
| fis1-1               | ggcggctcggcgctgatgtgaa                          |
| fis1-2               | ttcaatatcatctgcccgcggtatcctgaaatagaagtaggt      |
| fis1-3               | acctactctatcaggataccggccgcaagatgatattgaa        |
| fis1-4               | tcatacctacagcgaccgtaattaagttcggtcgcat           |
| fis1-5               | atgccgaccgaacttaataacggctgcctgatggatgatga       |
| fis1-6               | ccgattaagcatgtcgcaggt                           |
| dnm1-1               | ggtacacaggtcaacgtgcccgt                         |
| dnm1-2               | ttcaatatcatctgcccgcggtgagctgcaagacggaa          |
| dnm1-3               | ttccgtctgctcaactccggccgcaagatgatattgaa          |
| dnm1-4               | atctgtagggtgagcctgaggtaattaagttcggtcgcat        |
| dnm1-5               | atgccgaccgaacttaataacctcaggctacacctacagat       |
| dnm1-6               | gtgtctgtgtgtgtgtgtgt                            |
| vps1-1               | gacgcggcctcattcaggcaga                          |
| vps1-2               | ttcaatatcatctgcccgcggtgctgctatgcagaggt          |
| vps1-3               | acctctgcatagccagcaatcgccgcccgaagatgatattgaa     |
| vps1-4               | ttctcaaacgtagtactaaccttaattaagttcggtcgcat       |
| vps1-5               | atgccgaccgaacttaattaaggttagtactacgtttgagaaga    |
| vps1-6               | ctgtcgtggagaagttgcttgg                          |
